# Supplementary material for: Bulk Pt/CsPbBr3 Schottky junctions for charge boosting in robust triboelectric nanogenerators
Source: Royal Society of Chemistry journal article supplement (doi:10.1039/d0ta04463f), 2020-01-01
Supplement: d0ta04463f1.pdf [file d0ta04463f1.pdf]

**Supplementary Information for**

**Bulk Pt/CsPbBr<sub>3</sub> Schottky Junctions for Charge Boosting in Robust  
Triboelectric Nanogenerators**

Guixiang Xie<sup>1</sup>, Xiya Yang<sup>2,\*</sup>, Jialong Duan<sup>2</sup>, Yanyan Duan<sup>3</sup>, Qunwei Tang<sup>2,\*</sup>

<sup>1</sup> College of Chemistry and Material Science, Longyan University, Longyan 364012, PR China;

<sup>2</sup> College of Information Science and Technology, Jinan University, Guangzhou 510632, PR China;

<sup>3</sup> State Centre for International Cooperation on Designer Low-Carbon and Environmental Material  
(SCICDLCEM), School of Materials Science and Engineering, Zhengzhou University, Zhengzhou

450001, PR China;

E-mail: xiyayang@jnu.edu.cn, tangqunwei@jnu.edu.cn.

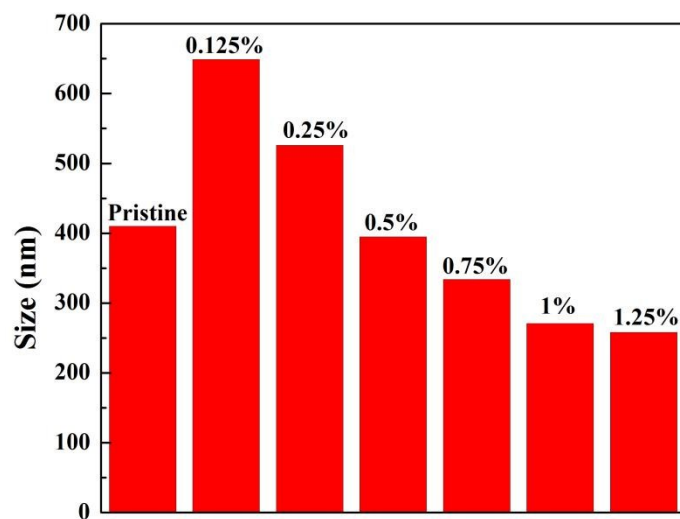

**Figure S1.** Statistical grain size distribution of pristine CsPbBr<sub>3</sub> and Pt/CsPbBr<sub>3</sub> films at different Pt dosages.

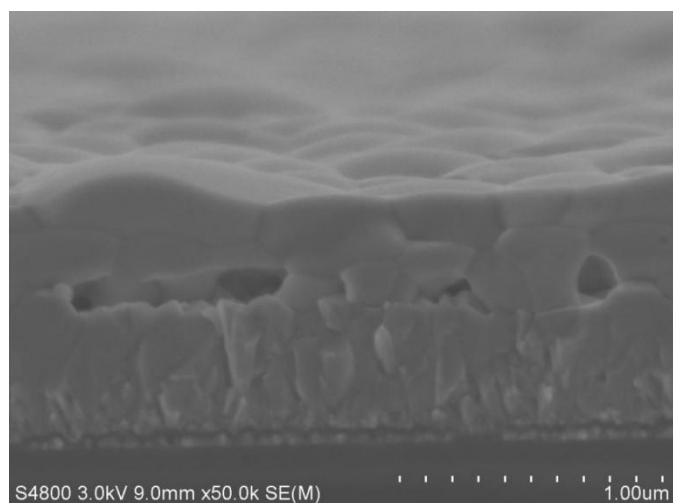

**Figure S2.** Cross-sectional SEM image of the 1% Pt/CsPbBr<sub>3</sub> film.

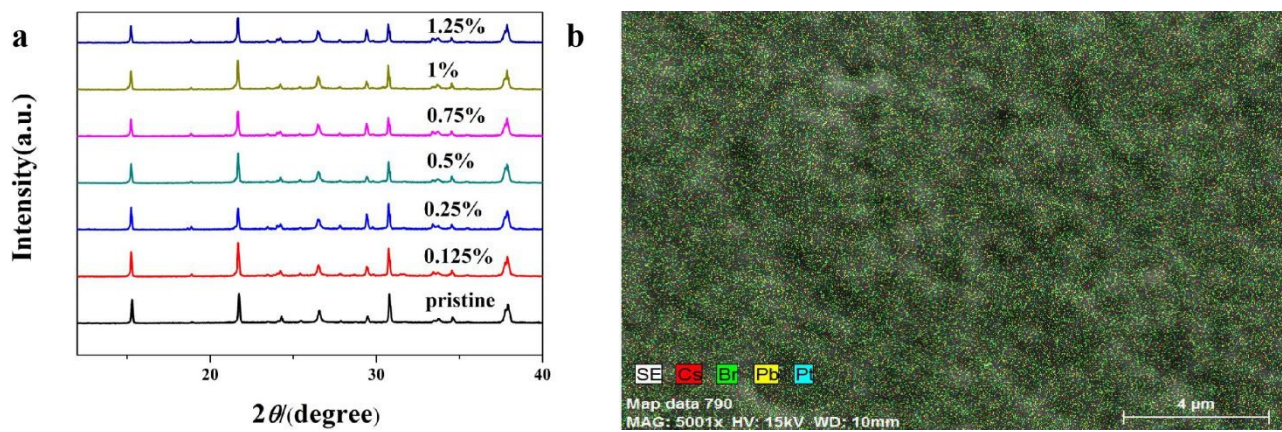

**Figure S3.** (a) XRD patterns of the Pt/CsPbBr<sub>3</sub> films at various Pt dosages. (b) EDS mapping of the 0.5% Pt/CsPbBr<sub>3</sub> film surface.

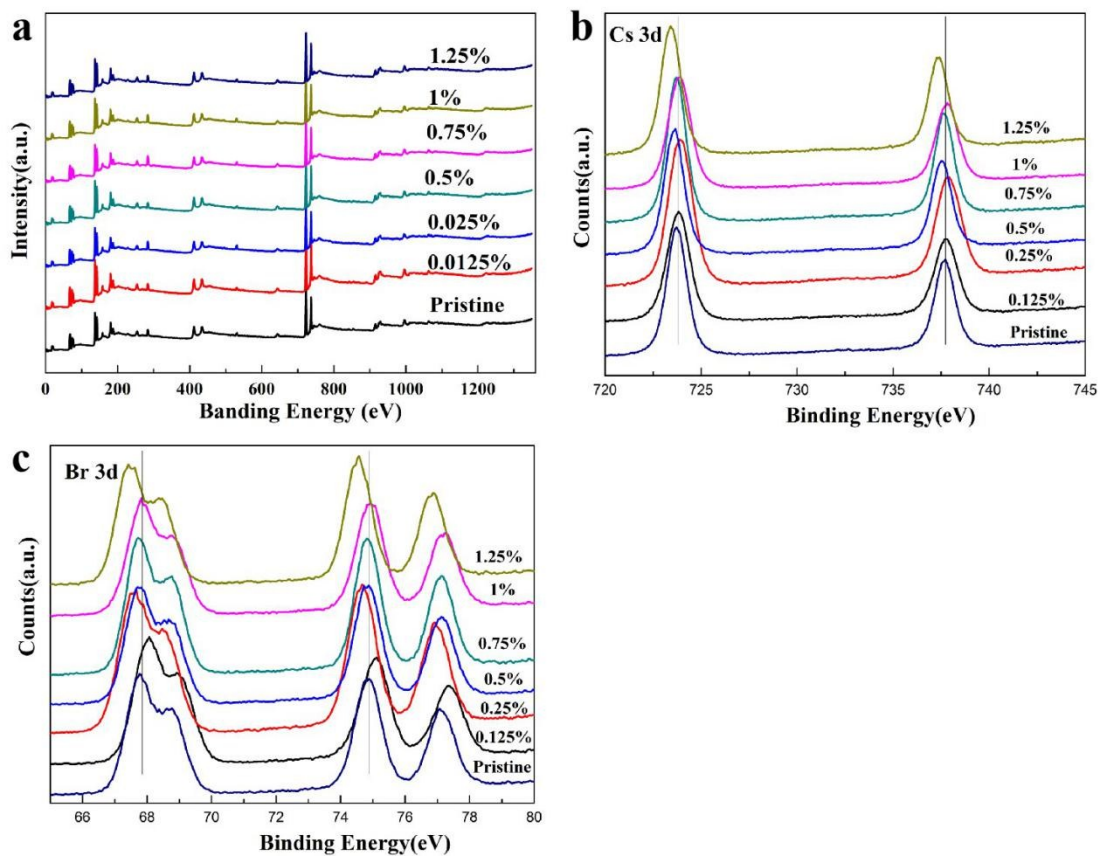

**Figure S4.** (a) High-resolution XPS spectra of Pt/CsPbBr<sub>3</sub> films with various Pt dosages. XPS spectra of (b) Cs 3d and (c) Br 3d.

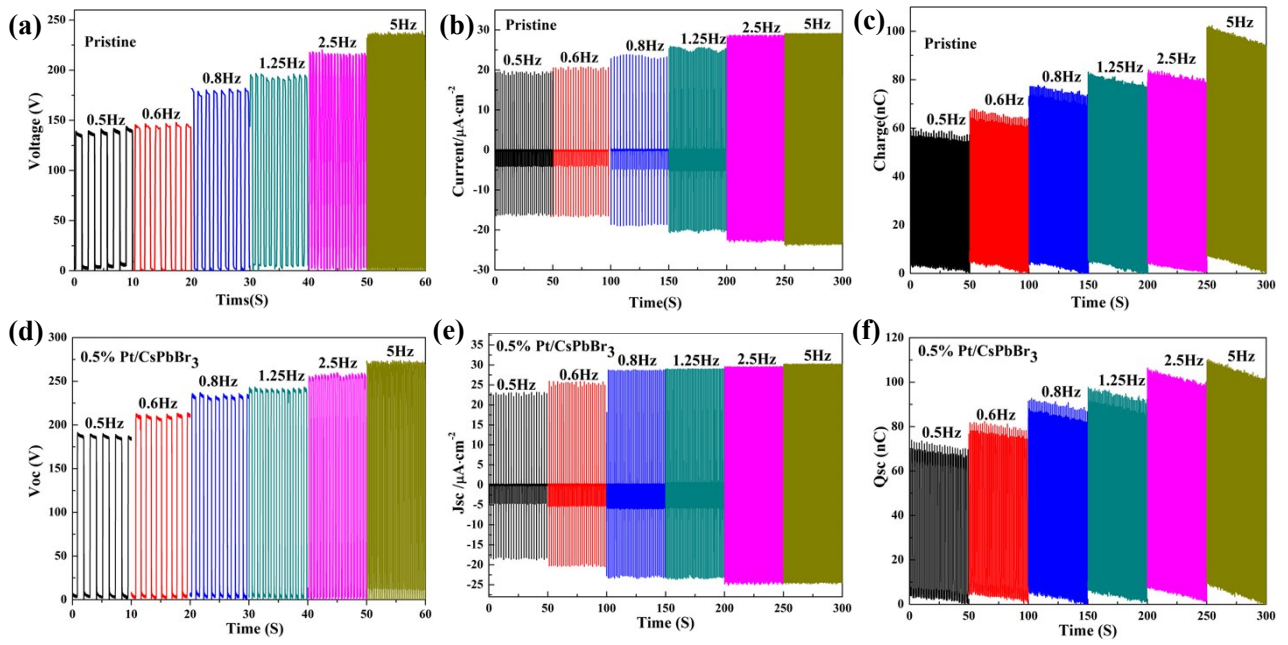

**Figure S5.** The comparison of (a) voltage, (b) current and (c) transfer charge outputs performance at various contact frequencies for pristine CsPbBr<sub>3</sub> and 0.5% Pt/CsPbBr<sub>3</sub> TENGs.

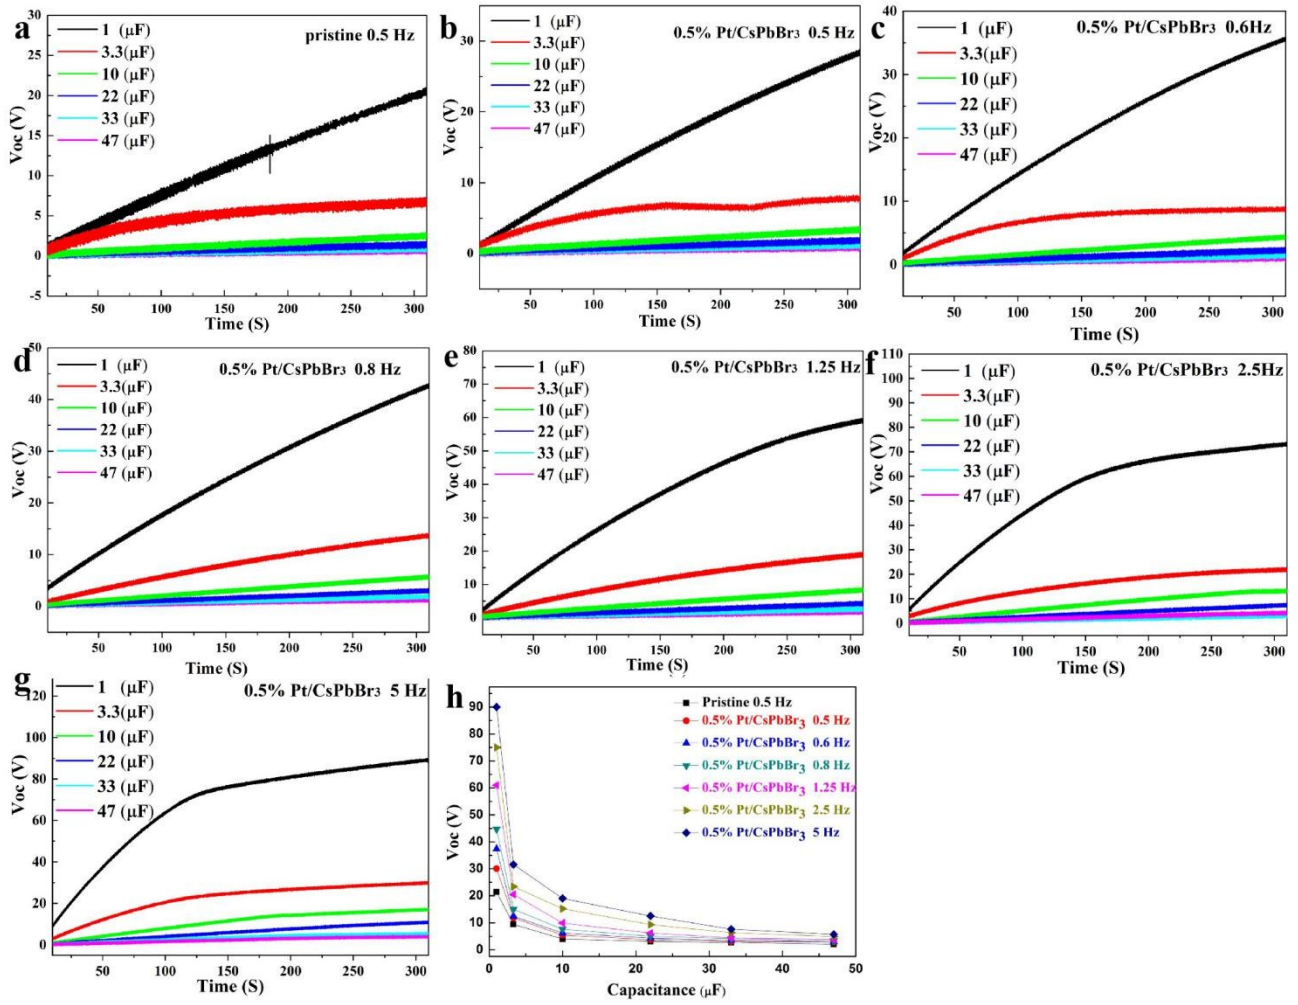

**Figure S6.** (a-g) The impacts of contact frequency on charging behavior of pristine and CsPbBr<sub>3</sub> and 0.5% Pt/CsPbBr<sub>3</sub> TENGs with load capacitances ranging from 1 to 47  $\mu\text{F}$ . (h) The  $V_{oc}$  output performances of perovskite TENGs at various capacitances with charging period of 300 s.
